# Supplementary material for: Low Intra-Host and Inter-Host Genetic Diversity of <em>Carnivore Protoparvovirus 1 </em>in Domestic Cats During A Feline Panleukopenia Outbreak
Source: Preprints.org preprint supplement (doi:10.20944/preprints202205.0157.v1), 2022-05-12
Supplement: Supplementary file 1 [file supplementary]

## Sheet: FPV&CPV read count
CPV1: Carnivore protoparvovirus 1
	26 key Amino acid position are divided into 8 region considering that the length of a read encoded protein is 50 at most.							region gap
region ID									FPV-ratio	CPV-per(%)
1	5	13	21					16	0.99872	0
2	80	87	93	101				21	0.984355	0.00102479
3	103	139						36	0.993338	0.000176552
4	232	262	267					35	0.992429	7.5982e-05
5	297	300	305	311	321	323	324	27	0.966838	0.000741865
6	359	370	375					16	0.996376	0.000320786
7	426	440						14	0.997594	2.62332e-05
8	564	568						4	0.999959	0
								average	0.991201	0.000295776
sample ID	region 1-reads	FPV-reads	FPV-ratio	region 2	FPV	FPV-ratio	region 3	FPV	FPV-ratio	region 4	FPV	FPV-ratio	region 5	FPV	FPV-ratio	region 6	FPV	FPV-ratio	region 7	FPV	FPV-ratio	region 8	FPV	FPV-ratio
150	763	762	0.998689	567378	559766	0.986584	347328	345227	0.993951	380453	376965	0.990832	1076837	1048185	0.973392	886286	884203	0.99765	696424	694996	0.99795	389883	389869	0.999964
151	674	673	0.998516	513239	506059	0.98601	351924	349907	0.994269	344886	343221	0.995172	1243556	1212297	0.974863	1185547	1182897	0.997765	745174	743775	0.998123	378307	378298	0.999976
195	617	616	0.998379	500460	494365	0.987821	345553	343816	0.994973	285033	283949	0.996197	904584	880902	0.97382	857827	856356	0.998285	558161	557222	0.998318	214591	214586	0.999977
PV132D	362	362	1	247068	241469	0.977338	188453	187238	0.993553	198409	194865	0.982138	624327	604489	0.968225	424493	423094	0.996704	314212	313314	0.997142	135382	135368	0.999897
PV134D	746	742	0.994638	510074	502705	0.985553	270486	268422	0.992369	215942	213668	0.989469	572931	554392	0.967642	412941	411338	0.996118	332632	331797	0.99749	188581	188575	0.999968
PV136D	658	657	0.99848	453467	446730	0.985143	262238	260563	0.993613	178230	177347	0.995046	646364	626393	0.969103	458557	456685	0.995918	412116	411152	0.997661	252615	252611	0.999984
PV139D	442	442	1	486297	479214	0.985435	245428	243636	0.992698	200768	198674	0.98957	520157	503422	0.967827	407698	406249	0.996446	340754	339963	0.997679	208093	208085	0.999962
PV146D	519	519	1	429908	423302	0.984634	264428	262756	0.993677	188825	188058	0.995938	643989	623350	0.967951	525880	524089	0.996594	418971	418042	0.997783	180160	180153	0.999961
PV147D	521	518	0.994242	389502	383217	0.983864	214017	212535	0.993075	157720	156878	0.994661	482956	466020	0.964933	314757	313439	0.995813	328153	327264	0.997291	187475	187469	0.999968
PV148D	323	323	1	353801	347866	0.983225	188113	186562	0.991755	159540	157866	0.989507	442017	411845	0.93174	257617	256398	0.995268	266040	265190	0.996805	238913	238899	0.999941
PV160D	302	302	1	346516	340716	0.983262	201667	199856	0.99102	186163	184330	0.990154	565440	546800	0.967035	360751	359070	0.99534	279211	278455	0.997292	195834	195824	0.999949
PV161D	398	398	1	316638	311731	0.984503	221597	220048	0.99301	233383	231064	0.990064	711436	688016	0.967081	491929	490001	0.996081	352687	351773	0.997408	171446	171440	0.999965
PV163D	182	182	1	221063	217607	0.984366	187501	186430	0.994288	215605	213677	0.991058	768639	745060	0.969324	527047	525172	0.996442	342505	341834	0.998041	151542	151540	0.999987
PV165D	349	349	1	265065	260758	0.983751	188126	186969	0.99385	192178	191106	0.994422	700217	678758	0.969354	464993	463088	0.995903	428685	427662	0.997614	206268	206258	0.999952
PV166D	384	384	1	301155	296429	0.984307	188432	187260	0.99378	162705	161856	0.994782	619134	600265	0.969524	390280	388526	0.995506	361130	360180	0.997369	192784	192777	0.999964
PV194D	484	484	1	336363	331170	0.984561	225312	223955	0.993977	167818	167022	0.995257	592368	573091	0.967458	442831	441160	0.996227	386984	386024	0.997519	185175	185164	0.999941
PV199D	371	370	0.997305	359471	353551	0.983531	219765	218219	0.992965	151841	150947	0.994112	542759	524420	0.966212	380909	379402	0.996044	309303	308508	0.99743	168580	168570	0.999941
PV200D	609	607	0.996716	721131	709954	0.984501	420875	418041	0.993266	328804	327271	0.995338	1147849	1110667	0.967607	873427	870515	0.996666	750774	749108	0.997781	396207	396196	0.999972
	8704	average	0.99872	7318596	average	0.984355	4531243	average	0.993338	3948303	average	0.992429	12805560	average	0.966838	9663770	average	0.996376	7623916	average	0.997594	4041836	average	0.999959
	cpv-reads-sum	0	0	cpv-sum	75	0.00102479	cpv-sum	8	0.000176552	cpv-sum	3	7.5982e-05	cpv-sum	95	0.000741865	cpv-sum	31	0.000320786	cpv-sum	2	2.62332e-05	cpv-sum	0	0

## Sheet: CPV-signatures
VP2 - protein		Amino acid position
Strain	aa/codon	5	13	21			80	87	93	101			103	139			232	262	267			297	300	305	311		321		323	324			359	370	375			426	440			564	568
FPV	aa	A	P	T			K	M	K	T			V	V	6 samples mainly V in 232 13 samples mainly I in 232		I/V	A	F			S	A	D	N/D		N		D	Y			G/A	Q	D			N	T			N	A
	codon	GCA	CCT	ACA			AAA	ATG	AAA	ACT			GTA	GTT			ATA/GTA	GCT	TTT/TTC			TCT	GCT	GAT	AAT/GAT		AAT		GAC	TAT			GGA/GCA	CAA-CAG	GAT			AAT	ACA			AAT	GCT
CPV-2a	aa	A/G	P/S	T/A			R/K	L/M	N	T/I			A	V			I	A/T	F/Y			A/S	G/A	Y/D	D		N/K		N/D	Y/I/L			A	Q/R	D/N			N/D/E	T/A			S/N	G/A
	codon	GCA/GGA	CCT/TCT	ACA/GCA			AGA/AAA	TTG-TTA/ATG	AAC-AAT	ACT-ACC/ATT			GCA	GTT			ATA	GCT/ACT	TTT/TAT			GCT/TCT	GGT/GCT	TAT/GAT	GAT		AAT-AAC/AAA		AAC-AAT/GAC	TAT-TAC/ATT/CTT			GCA	CAA/CGA	GAT/AAT			AAT/GAT/GAA	ACA/GCA			AGT/AAT	GGT/GCT
CPV-2b	aa	A/G	P/S	T			R	L/M	N	T/I			A	V			I	A/T	F/Y			A/S	G/A	Y/D	D		N/K		N	Y/I/L			A	Q	D/N			D/A	T			S/N	G/A
	codon	GCA/GGA	CCT/TCT	ACA			AGA	TTG-TTA/ATG	AAC	ACT-ACC/ATT			GCA	GTT			ATA	GCT/ACT	TTT/TAT			GCT/TCT	GGT/GCT	TAT/GAT	GAT		AAT/AAA		AAC	TAT/ATT /TTA			GCA	CAA	GAT/AAT			GAT/AAT	ACA			AGT/AAT	GGT/GCT
CPV-2c	aa	A/G	P	T			R	L	N	T			A	V/I			I	A	F/Y			A	G	Y	D		N		N	Y/I			A	Q/R	D			E	T			S	G
	codon	GCA/GGA	CCT	ACA			AGA	TTG	AAC	ACT			GCA	GTT/ATT			ATA	GCT	TTT/TAT			GCT	GGT	TAT	GAT		AAT-AAC		AAC	TAT/ATT			GCA	CAA/CGA	GAT			GAA	ACA			AGT	GGT
		5-G	13-S	21-A		sample	80-R	87-L	93-N	101-I		sample	103-A	139-I	sample		232	262-T	267-Y		sample	297-A	300-G	305-Y	311	sample	321-K	sample	323-N	324-I,L			359	370-R	375-N			426-D,E,A	440-A			564-S	568-G
		0	0	0		PV132D	2	PV194D	PV136D	PV132D		151	2	PV134D	PV150D	I	861	PV161D	0		PV146D	3	PV194D	5		PV150D	3	PV132D	2	0				PV146D	150			0	PV199D			0	0
						PV134D	6	2	2	14		PV146D	2	2		V	3	3			PV147D	2	2	4		PV139D	3	PV147D	3					2	2				2
						PV136D	6		PV148D	PV147D		PV165D	2		PV151D	V	722				PV163D	2		2		PV160D	3	PV160D	4					PV161D
						PV139D	4		3	2						I	2				PV165D	2		3		PV161D	2	PV161D	3					3
						PV146D	2			PV148D					PV195D	V	698				PV199D	4		3		PV199D	2	PV163D	2					PV165D
						PV147D	3			2						I	3							5				PV199D	2					2
						PV148D	3			PV199D					PV132D	V	787							6				PV200D	2
						PV160D	5			2						I	14							5
						PV161D	3								PV134D	I	824							4
						PV165D	2									I	3							3
						PV194D	4								PV136D	V	643							3
						PV199D	4								PV139D	I	826							5
						PV200D	3								PV146D	V	662							7
																I	4							8
															PV147D	V	692							6
															PV148D	V	654							3
																I	4							2
															PV160D	I	768							6
															PV161D	I	956						SUM	80
															PV163D	V	810
																I	6
															PV165D	V	800
																I	2
															PV166D	V	659
															PV194D	V	681
																I	3
															PV199D	V	562
																I	5
															PV200D	V	635
																I	2
