# Supplementary material for: Low Intra-Host and Inter-Host Genetic Diversity of <em>Carnivore Protoparvovirus 1 </em>in Domestic Cats During A Feline Panleukopenia Outbreak
Source: Preprints.org preprint supplement (doi:10.20944/preprints202205.0157.v1), 2022-05-12
Supplement: Supplementary file 2 [file Supplementary_Excel_File_S1_VP2 FPV vs CPV2 variants.xlsx]

## Sheet: VP2 FPV vs CPV2 variants
VP2 - protein		Amino acid position
Strain	aa/codon	5	13	21	80	87	93	101	103	139	232	262	267	297	300	305	311	321	323	324	359	370	375	426	440	564	568
FPV	aa	A	P	T	K	M	K	T	V	V	I/V	A	F	S	A	D	N/D	N	D	Y	G/A	Q	D	N	T	N	A
	codon	GCA	CCT	ACA	AAA	ATG	AAA	ACT	GTA	GTT	ATA/GTA	GCT	TTT/TTC	TCT	GCT	GAT	AAT/GAT	AAT	GAC	TAT	GGA/GCA	CAA-CAG	GAT	AAT	ACA	AAT	GCT
CPV-2a	aa	A/G	P/S	T/A	R/K	L/M	N	T/I	A	V	I	A/T	F/Y	A/S	G/A	Y/D	D	N/K	N/D	Y/I/L	A	Q/R	D/N	N/D/E	T/A	S/N	G/A
	codon	GCA/GGA	CCT/TCT	ACA/GCA	AGA/AAA	TTG-TTA/ATG	AAC-AAT	ACT-ACC/ATT	GCA	GTT	ATA	GCT/ACT	TTT/TAT	GCT/TCT	GGT/GCT	TAT/GAT	GAT	AAT-AAC/AAA	AAC-AAT/GAC	TAT-TAC/ATT/CTT	GCA	CAA/CGA	GAT/AAT	AAT/GAT/GAA	ACA/GCA	AGT/AAT	GGT/GCT
CPV-2b	aa	A/G	P/S	T	R	L/M	N	T/I	A	V	I	A/T	F/Y	A/S	G/A	Y/D	D	N/K	N	Y/I/L	A	Q	D/N	D/A	T	S/N	G/A
	codon	GCA/GGA	CCT/TCT	ACA	AGA	TTG-TTA/ATG	AAC	ACT-ACC/ATT	GCA	GTT	ATA	GCT/ACT	TTT/TAT	GCT/TCT	GGT/GCT	TAT/GAT	GAT	AAT/AAA	AAC	TAT/ATT /TTA	GCA	CAA	GAT/AAT	GAT/AAT	ACA	AGT/AAT	GGT/GCT
CPV-2c	aa	A/G	P	T	R	L	N	T	A	V/I	I	A	F/Y	A	G	Y	D	N	N	Y/I	A	Q/R	D	E	T	S	G
	codon	GCA/GGA	CCT	ACA	AGA	TTG	AAC	ACT	GCA	GTT/ATT	ATA	GCT	TTT/TAT	GCT	GGT	TAT	GAT	AAT-AAC	AAC	TAT/ATT	GCA	CAA/CGA	GAT	GAA	ACA	AGT	GGT
