# Supplementary material for: Low Intra-Host and Inter-Host Genetic Diversity of <em>Carnivore Protoparvovirus 1 </em>in Domestic Cats During A Feline Panleukopenia Outbreak
Source: Preprints.org preprint supplement (doi:10.20944/preprints202205.0157.v1), 2022-05-12
Supplement: Supplementary file 4 [file Supplementary_Excel_File_S3_FPV_RNA_analysis.xlsx]

## Sheet: 18 consensus sequences 
	NS1																																VP2
sample ID	28	67	159	222	291	426	492	522	621	640	825	999	1251	1327	1518	1602	1633	1653	1736	1785	1926	1959	1977	2080	2082	2083	2108	2175	2262	2346	2355	2433	2685	2904	3208	3324	3333	3385	3552	3555	3894	4035	4086	4230
Reference	G	G	T	A	A	A	A	G	C	T	G	G	G	G	A	A	C	C	G	C	A	T	G	A	T	T	T	A	C	G	A	A	G	T	G	C	T	T	A	G	A	G	T	A
PV132D	A	A	C	A	G	G	G	A	T	C	G	G	G	A	G	G	G	T	A	A	G	C	A	G	A	C	C	G	T	A	G	G	A	A	G	T	C	C	G	A	G	A	C	G
PV134D	A	A	C	A	G	G	G	A	T	C	G	A	G	A	G	G	G	T	A	A	G	C	A	G	A	C	C	G	T	A	G	G	A	A	A	T	C	C	G	A	G	A	C	G
PV136D	A	A	C	G	G	G	G	A	T	C	G	G	A	A	G	G	G	T	A	A	G	C	A	G	A	C	C	G	T	A	G	G	A	A	G	T	C	C	G	A	G	A	C	G
PV139D	A	A	C	A	G	G	G	A	T	C	G	G	G	A	G	G	G	T	A	A	G	C	A	G	A	C	C	G	T	A	G	G	A	A	A	T	C	C	G	A	G	A	C	G
PV146D	A	A	C	G	G	G	G	A	T	C	A	G	G	A	G	G	G	T	A	A	G	C	A	G	A	C	T	G	T	A	G	G	A	A	G	T	C	C	G	A	G	A	C	G
PV147D	A	A	C	G	G	G	G	A	T	C	G	G	G	A	G	G	G	T	A	A	G	C	A	G	A	C	C	G	T	A	G	G	A	A	G	T	C	C	G	A	G	A	C	G
PV148D	A	A	C	A	G	G	G	A	T	C	G	G	G	A	G	G	G	T	A	A	G	C	A	G	A	C	C	G	T	A	G	G	A	A	G	T	C	C	G	A	G	A	C	G
PV150D	A	A	C	A	G	G	G	A	T	C	G	G	G	A	G	G	G	T	A	A	G	C	A	G	A	C	C	G	T	A	G	G	A	A	A	T	C	C	G	A	G	A	C	G
PV151D	A	A	C	G	G	G	G	A	T	C	G	G	G	A	G	G	G	T	A	A	G	C	A	G	A	C	C	G	T	A	G	G	A	A	G	T	C	C	G	A	G	A	C	G
PV160D	A	A	C	A	G	G	G	A	T	C	G	G	G	A	G	G	G	T	A	A	G	C	A	G	A	C	C	G	T	A	G	G	A	A	A	T	C	C	G	A	G	A	C	G
PV161D	A	A	C	A	G	G	G	A	T	C	G	G	G	A	G	G	G	T	A	A	G	C	A	G	A	C	C	G	T	A	G	G	A	A	A	T	C	C	G	A	G	A	C	G
PV163D	A	A	C	A	G	G	G	A	T	C	G	G	G	A	G	G	G	T	A	A	G	C	A	G	A	C	C	G	T	A	G	G	A	A	G	T	C	C	G	A	G	A	C	G
PV165D	A	A	C	G	G	G	G	A	T	C	G	G	G	A	G	G	G	T	A	A	G	C	A	G	A	C	C	G	T	A	G	G	A	A	G	T	C	C	G	A	G	A	C	G
PV166D	A	A	C	A	G	G	G	A	T	C	G	G	G	A	G	G	G	T	A	A	G	C	A	G	A	C	C	G	T	A	G	G	A	A	G	T	C	C	G	A	G	A	C	G
PV194D	A	A	C	G	G	G	G	A	T	C	G	G	G	A	G	G	G	T	A	A	G	C	A	G	A	C	C	G	T	A	G	G	A	A	G	T	C	C	G	A	G	A	C	G
PV195D	A	A	C	G	G	G	G	A	T	C	G	G	G	A	G	G	G	T	A	A	G	C	A	G	A	C	C	G	T	A	G	G	A	A	G	T	C	C	G	A	G	A	C	G
PV199D	A	A	C	G	G	G	G	A	T	C	G	G	G	A	G	G	G	T	A	A	G	C	A	G	A	C	C	G	T	A	G	G	A	A	G	T	C	C	G	A	G	A	C	G
PV200D	A	A	C	G	G	G	G	A	T	C	G	G	G	A	G	G	G	T	A	A	G	C	A	G	A	C	C	G	T	A	G	G	A	A	G	T	C	C	G	A	G	A	C	G
RNA-seq	A	A	C		G	G	G	A	T	C				A	G	G	G	T	A	A	G	C	A	G	A	C		G	T	A	G	G	A	A		T	C	C	G	A	G	A	C	G

## Sheet: meta-transcriptomics parvoviral
site	length	28	67	159	222	291	426	492	522	621	640	825	999	1251	1327	1518	1602	1633	1653	1736	1785	1926	1959	1977	2080	2082	2083	2108	2175	2262	2346	2355	2433	2685	2873	2904	3208	3324	3333	3385	3552	3555	3894	4035	4086	4201	4214	4217	4221
ref	4269	G	G	T	A	A	A	A	G	C	T	G	G	G	G	A	A	C	C	G	C	A	T	G	A	T	T	T	A	C	G	A	A	G	G	T	G	C	T	T	A	G	A	G	T	C	G	C	G
132	4968	A	A	C	A	G	G	G	A	T	C	G	G	G	A	G	G	G	T	A	A	G	C	A	G	A	C	C	G	T	A	G	G	A	G	A	G	T	C	C	G	A	G	A	C	C	G	C	G
134	4478	A	A	C	A	G	G	G	A	T	C	G	A	G	A	G	G	G	T	A	A	G	C	A	G	A	C	C	G	T	A	G	G	A	G	A	A	T	C	C	G	A	G	A	C	C	G	C	G
136	4500	A	A	C	G	G	G	G	A	T	C	G	G	A	A	G	G	G	T	A	A	G	C	A	G	A	C	C	G	T	A	G	G	A	T	A	G	T	C	C	G	A	G	A	C	C	G	C	G
139	4979	A	A	C	A	G	G	G	A	T	C	G	G	G	A	G	G	G	T	A	A	G	C	A	G	A	C	C	G	T	A	G	G	A	G	A	A	T	C	C	G	A	G	A	C	C	G	C	G
146-1	4919	A	A	C	G	G	G	G	A	T	C	A	G	G	A	G	G	G	T	A	A	G	C	A	G	A	C	T	G	T	A	G	G	A	G	A	G	T	C	C	G	A	G	A	C	C	G	C	G
146-2	5049	A	A	C	G	G	G	G	A	T	C	A	G	G	A	G	G	G	T	A	A	G	C	A	G	A	C	T	G	T	A	G	G	A	G	A	G	T	C	C	G	A	G	A	C	C	G	C	G
147	5023	A	A	C	G	G	G	G	A	T	C	G	G	G	A	G	G	G	T	A	A	G	C	A	G	A	C	C	G	T	A	G	G	A	G	A	G	T	C	C	G	A	G	A	C	C	G	C	G
148	5193	A	A	C	A	G	G	G	A	T	C	G	G	G	A	G	G	G	T	A	A	G	C	A	G	A	C	C	G	T	A	G	G	A	G	A	G	T	C	C	G	A	G	A	C	C	G	C	G
150	4576	A	A	C	A	G	G	G	A	T	C	G	G	G	A	G	G	G	T	A	A	G	C	A	G	A	C	C	G	T	A	G	G	A	G	A	A	T	C	C	G	A	G	A	C	C	G	C	G
151	4891	A	A	C	G	G	G	G	A	T	C	G	G	G	A	G	G	G	T	A	A	G	C	A	G	A	C	C	G	T	A	G	G	A	G	A	G	T	C	C	G	A	G	A	C	C	G	C	G
160-1	4546	A	A	C	A	G	G	G	A	T	C	G	G	G	A	G	G	G	T	A	A	G	C	A	G	A	C	C	G	T	A	G	G	A	G	A	A	T	C	C	G	A	G	A	C	C	G	A	G
160-2	4547	A	A	C	A	G	G	G	A	T	C	G	G	G	A	G	G	G	T	A	A	G	C	A	G	A	C	C	G	T	A	G	G	A	G	A	A	T	C	C	G	A	G	A	C	C	G	C	G
161	4948	A	A	C	A	G	G	G	A	T	C	G	G	G	A	G	G	G	T	A	A	G	C	A	G	A	C	C	G	T	A	G	G	A	G	A	A	T	C	C	G	A	G	A	C	C	G	C	G
163	5001	A	A	C	A	G	G	G	A	T	C	G	G	G	A	G	G	G	T	A	A	G	C	A	G	A	C	C	G	T	A	G	G	A	G	A	G	T	C	C	G	A	G	A	C	C	G	C	G
165	4886	A	A	C	G	G	G	G	A	T	C	G	G	G	A	G	G	G	T	A	A	G	C	A	G	A	C	C	G	T	A	G	G	A	G	A	G	T	C	C	G	A	G	A	C	C	G	C	G
194-1	4304	A	A	C	G	G	G	G	A	T	C	G	G	G	A	G	G	G	T	A	A	G	C	A	G	A	C	C	G	T	A	G	G	A	G	A	G	T	C	C	G	A	G	A	C	A	T	C	T
194-2	4262	A	A	C	G	G	G	G	A	T	C	G	G	G	A	G	G	G	T	A	A	G	C	A	G	A	C	C	G	T	A	G	G	A	G	A	G	T	C	C	G	A	G	A	C	C	G	C	G
195	4841	A	A	C	G	G	G	G	A	T	C	G	G	G	A	G	G	G	T	A	A	G	C	A	G	A	C	C	G	T	A	G	G	A	G	A	G	T	C	C	G	A	G	A	C	C	G	C	G
199	4895	A	A	C	G	G	G	G	A	T	C	G	G	G	A	G	G	G	T	A	A	G	C	A	G	A	C	C	G	T	A	G	G	A	G	A	G	T	C	C	G	A	G	A	C	C	G	C	G
200	5021	A	A	C	G	G	G	G	A	T	C	G	G	G	A	G	G	G	T	A	A	G	C	A	G	A	C	C	G	T	A	G	G	A	G	A	G	T	C	C	G	A	G	A	C	C	G	C	G
200-2	1089
166-1	1791
166-2	1791
166-3	1075
[truncated: 2 more columns]
