# Supplementary material for: Low Intra-Host and Inter-Host Genetic Diversity of <em>Carnivore Protoparvovirus 1 </em>in Domestic Cats During A Feline Panleukopenia Outbreak
Source: Preprints.org preprint supplement (doi:10.20944/preprints202205.0157.v1), 2022-05-12
Supplement: Supplementary file 5 [file Supplementary_Excel_File_S4_MIDAS_merge_snps_infomation.xlsx]

## Sheet: Sheet1
site_id	ref_id	ref_pos	ref_allele	major_allele	minor_allele	count_samples	count_a	count_c	count_g	count_t	locus_type	gene_id	snp_type	site_type	amino_acids
9	EU659111.1	9	C	C	T	19	802	873062	3148	9229	CDS	NS1	bi	4D	G,G,G,G
27	EU659111.1	27	A	A	G	19	3408969	406	43868	29133	CDS	NS1	bi	3D	E,D,E,D
28	EU659111.1	28	G	A	G	19	3934784	551	149303	20872	CDS	NS1	bi	1D	I,L,V,F
39	EU659111.1	39	A	A	G	19	5659951	1739	59509	49223	CDS	NS1	bi	4D	G,G,G,G
43	EU659111.1	43	A	A	T	19	5767859	2050	49697	72056	CDS	NS1	bi	1D	N,H,D,Y
44	EU659111.1	44	A	A	T	19	5820954	1442	57467	69800	CDS	NS1	bi	1D	N,T,S,I
80	EU659111.1	80	C	C	G	19	2738	8594072	125580	67951	CDS	NS1	bi	1D	_,S,W,L
201	EU659111.1	201	G	G	C	19	45809	119397	11185114	2482	CDS	NS1	bi	3D	I,I,M,I
222	EU659111.1	222	A	G	A	19	5609298	6862	6592124	8162	CDS	NS1	bi	3D	E,D,E,D
294	EU659111.1	294	A	A	G	19	11200756	3160	184214	74182	CDS	NS1	bi	3D	K,N,K,N
305	EU659111.1	305	A	A	G	19	11957127	53003	162114	114105	CDS	NS1	bi	1D	E,A,G,V
306	EU659111.1	306	A	A	G	19	11580494	21411	121833	72811	CDS	NS1	bi	3D	E,D,E,D
355	EU659111.1	355	C	C	T	19	23221	18328110	71507	189848	CDS	NS1	bi	1D	K,Q,E,_
358	EU659111.1	358	C	C	T	19	21458	19272576	119396	196548	CDS	NS1	bi	1D	N,H,D,Y
572	EU659111.1	572	G	G	A	19	415934	269697	34114659	5718	CDS	NS1	bi	1D	K,T,R,I
576	EU659111.1	576	T	T	C	19	246908	351630	8164	33024608	CDS	NS1	bi	3D	Q,H,Q,H
579	EU659111.1	579	G	G	C	19	231149	371580	31868632	9697	CDS	NS1	bi	3D	K,N,K,N
611	EU659111.1	611	A	A	G	19	29403001	8055	307142	195982	CDS	NS1	bi	1D	H,P,R,L
712	EU659111.1	712	T	T	G	19	10955	37196	473050	24642162	CDS	NS1	bi	1D	I,L,V,F
714	EU659111.1	714	T	T	A	19	417768	24213	6614	24480084	CDS	NS1	bi	3D	L,F,L,F
716	EU659111.1	716	A	A	T	19	23304742	9350	59044	380445	CDS	NS1	bi	1D	N,T,S,I
717	EU659111.1	717	C	C	A	19	293711	23923812	57126	79803	CDS	NS1	bi	3D	K,N,K,N
719	EU659111.1	719	T	T	G	19	11755	77933	255400	23754685	CDS	NS1	bi	1D	Y,S,C,F
720	EU659111.1	720	T	T	C	19	18735	250175	10524	23689920	CDS	NS1	bi	3D	L,F,L,F
770	EU659111.1	770	T	T	C	19	174889	273317	14261	21281690	CDS	NS1	bi	1D	K,T,R,M
778	EU659111.1	778	G	G	A	19	202821	148423	19643283	4816	CDS	NS1	bi	1D	K,Q,E,_
825	EU659111.1	825	G	G	A	19	999535	13147	19453077	5394	CDS	NS1	bi	4D	G,G,G,G
870	EU659111.1	870	G	G	T	19	23419	3622	21849242	237745	CDS	NS1	bi	4D	R,R,R,R
943	EU659111.1	943	A	A	T	19	26518988	4847	257563	271663	CDS	NS1	bi	2D	M,L,V,L
999	EU659111.1	999	G	G	A	19	1452984	5515	30376456	7388	CDS	NS1	bi	3D	L,F,L,F
1126	EU659111.1	1126	A	A	G	19	35496261	6752	502007	329575	CDS	NS1	bi	1D	I,L,V,F
1129	EU659111.1	1129	A	A	T	19	34123006	6024	315505	355535	CDS	NS1	bi	1D	K,Q,E,_
1251	EU659111.1	1251	G	G	A	19	1640588	3979	28160119	40477	CDS	NS1	bi	4D	V,V,V,V
1256	EU659111.1	1256	A	A	G	19	30487292	7457	355599	179728	CDS	NS1	bi	1D	N,T,S,I
1295	EU659111.1	1295	T	T	G	19	19428	47763	341613	27856834	CDS	NS1	bi	1D	Y,S,C,F
1298	EU659111.1	1298	A	A	C	19	28704241	342213	49889	10812	CDS	NS1	bi	1D	N,T,S,I
1335	EU659111.1	1335	A	A	G	19	26574202	25313	312358	99119	CDS	NS1	bi	3D	E,D,E,D
1337	EU659111.1	1337	C	C	T	19	18315	27357172	84750	362030	CDS	NS1	bi	1D	D,A,G,V
1569	EU659111.1	1569	C	C	G	19	10721	31041909	412962	46102	CDS	NS1	bi	3D	E,D,E,D
2072	EU659111.1	2072	A	A	T	19	8812834	19606	33790	132176	IGR	NA	bi	NA	NA
2108	EU659111.1	2108	T	C	T	19	16419	11054049	7549	668730	IGR	NA	bi	NA	NA
2386	EU659111.1	2386	G	G	A	19	66816	48349	5194510	788	IGR	NA	bi	NA	NA
2391	EU659111.1	2391	T	T	C	19	26655	61950	4143	4948067	IGR	NA	bi	NA	NA
2396	EU659111.1	2396	C	C	A	19	50051	4597034	2729	12744	IGR	NA	bi	NA	NA
2406	EU659111.1	2406	A	A	C	19	3469020	52850	10359	1880	IGR	NA	bi	NA	NA
2408	EU659111.1	2408	C	C	A	19	40498	3663030	1396	5717	IGR	NA	bi	NA	NA
2411	EU659111.1	2411	C	C	A	19	51818	3692110	680	2422	IGR	NA	bi	NA	NA
2412	EU659111.1	2412	A	A	C	19	3875890	68037	4469	588	IGR	NA	bi	NA	NA
2413	EU659111.1	2413	A	A	C	19	3783752	55732	4863	534	IGR	NA	bi	NA	NA
2415	EU659111.1	2415	A	A	C	19	3199217	48543	4989	605	IGR	NA	bi	NA	NA
2420	EU659111.1	2420	C	C	A	19	44108	3298956	241	1101	IGR	NA	bi	NA	NA
2429	EU659111.1	2429	G	G	C	19	20593	35350	2800647	799	IGR	NA	bi	NA	NA
2430	EU659111.1	2430	T	T	C	19	22077	46725	2621	2798381	IGR	NA	bi	NA	NA
2438	EU659111.1	2438	C	C	A	19	26368	2604234	721	1455	IGR	NA	bi	NA	NA
2440	EU659111.1	2440	C	C	A	19	28233	2700172	326	840	IGR	NA	bi	NA	NA
2441	EU659111.1	2441	C	C	A	19	29925	2547485	272	1072	IGR	NA	bi	NA	NA
2443	EU659111.1	2443	C	C	A	19	34526	2304164	1428	2074	IGR	NA	bi	NA	NA
2447	EU659111.1	2447	T	T	C	19	3018	55830	329	2298407	IGR	NA	bi	NA	NA
2461	EU659111.1	2461	G	G	A	19	28430	8399	1181697	2968	IGR	NA	bi	NA	NA
2467	EU659111.1	2467	A	A	C	19	1767140	17978	2486	482	IGR	NA	bi	NA	NA
2468	EU659111.1	2468	A	A	C	19	1752205	25934	2642	2287	IGR	NA	bi	NA	NA
2469	EU659111.1	2469	A	A	C	19	1700715	34101	3643	9336	IGR	NA	bi	NA	NA
2470	EU659111.1	2470	A	A	C	19	1669993	38987	5280	8279	IGR	NA	bi	NA	NA
2471	EU659111.1	2471	A	A	C	19	1633964	49096	3427	6725	IGR	NA	bi	NA	NA
2472	EU659111.1	2472	A	A	C	19	1554162	84132	11259	7625	IGR	NA	bi	NA	NA
2473	EU659111.1	2473	A	A	C	19	1470711	92319	12843	1152	IGR	NA	bi	NA	NA
2474	EU659111.1	2474	A	A	C	19	1318802	62703	8433	1093	IGR	NA	bi	NA	NA
2477	EU659111.1	2477	C	C	A	19	17055	1335858	856	2397	IGR	NA	bi	NA	NA
2589	EU659111.1	2589	C	C	T	19	366	302785	440	3724	CDS	VP2	bi	3D	K,N,K,N
2591	EU659111.1	2591	G	G	T	19	784	422	299030	45737	CDS	VP2	bi	1D	E,A,G,V
2595	EU659111.1	2595	T	T	G	19	875	1164	5039	416411	CDS	VP2	bi	4D	S,S,S,S
2596	EU659111.1	2596	G	G	T	19	1250	883	458318	10408	CDS	VP2	bi	2D	R,R,G,_
2597	EU659111.1	2597	G	G	T	19	1702	1093	469640	41639	CDS	VP2	bi	1D	E,A,G,V
2599	EU659111.1	2599	G	G	T	19	1653	1619	532592	109588	CDS	VP2	bi	1D	S,R,G,C
2600	EU659111.1	2600	G	G	T	19	1351	767	524161	142419	CDS	VP2	bi	1D	D,A,G,V
2602	EU659111.1	2602	G	G	T	19	4219	501	542928	189944	CDS	VP2	bi	2D	R,R,G,W
2603	EU659111.1	2603	G	G	T	19	3482	948	536186	241511	CDS	VP2	bi	1D	E,A,G,V
2604	EU659111.1	2604	G	G	T	19	7384	1258	812318	125763	CDS	VP2	bi	4D	G,G,G,G
2605	EU659111.1	2605	G	G	T	19	7190	1141	682940	282556	CDS	VP2	bi	1D	S,R,G,C
2606	EU659111.1	2606	G	G	T	19	5769	1755	894221	206158	CDS	VP2	bi	1D	D,A,G,V
2607	EU659111.1	2607	T	T	G	19	4190	3505	69367	1026497	CDS	VP2	bi	4D	G,G,G,G
2610	EU659111.1	2610	T	T	G	19	4209	6987	146292	1353137	CDS	VP2	bi	4D	G,G,G,G
2611	EU659111.1	2611	G	G	T	19	15031	4495	1525400	168265	CDS	VP2	bi	1D	S,R,G,C
2612	EU659111.1	2612	G	G	T	19	10091	5068	1805706	241594	CDS	VP2	bi	1D	D,A,G,V
2613	EU659111.1	2613	T	T	G	19	6469	7207	66964	1966346	CDS	VP2	bi	4D	G,G,G,G
2614	EU659111.1	2614	G	G	T	19	16164	4241	2433356	164675	CDS	VP2	bi	1D	S,R,G,C
2615	EU659111.1	2615	G	G	T	19	11186	4843	2971070	643415	CDS	VP2	bi	1D	D,A,G,V
2616	EU659111.1	2616	T	T	G	19	7278	21069	962142	3268957	CDS	VP2	bi	4D	G,G,G,G
2617	EU659111.1	2617	T	T	G	19	10962	24829	295975	4101135	CDS	VP2	bi	1D	T,P,A,S
2619	EU659111.1	2619	T	T	G	19	5483	14875	763511	3948309	CDS	VP2	bi	4D	S,S,S,S
2620	EU659111.1	2620	G	G	T	19	17069	6211	4499514	439563	CDS	VP2	bi	2D	R,R,G,W
2621	EU659111.1	2621	G	G	T	19	16530	9402	4733416	410626	CDS	VP2	bi	1D	E,A,G,V
2622	EU659111.1	2622	G	G	T	19	20247	2895	4952567	438997	CDS	VP2	bi	4D	G,G,G,G
2623	EU659111.1	2623	G	G	T	19	13366	3303	5122259	567173	CDS	VP2	bi	1D	S,R,G,C
2624	EU659111.1	2624	G	G	T	19	7419	1823	5911472	419112	CDS	VP2	bi	1D	D,A,G,V
2625	EU659111.1	2625	T	T	G	19	3304	11076	310962	5839055	CDS	VP2	bi	4D	G,G,G,G
2626	EU659111.1	2626	G	G	T	19	26121	11513	6225228	428225	CDS	VP2	bi	2D	M,L,V,L
2627	EU659111.1	2627	T	T	G	19	11799	41874	308823	6109289	CDS	VP2	bi	1D	E,A,G,V
2628	EU659111.1	2628	G	G	T	19	41472	11973	6464277	402619	CDS	VP2	bi	4D	V,V,V,V
2629	EU659111.1	2629	G	G	T	19	47389	21561	6420010	546101	CDS	VP2	bi	2D	R,R,G,W
2630	EU659111.1	2630	G	G	T	19	68349	33909	6737539	417218	CDS	VP2	bi	1D	E,A,G,V
2634	EU659111.1	2634	T	T	G	19	6331	23830	88144	8278312	CDS	VP2	bi	3D	I,I,M,I
2664	EU659111.1	2664	A	A	G	19	11261281	756	319108	39346	CDS	VP2	bi	3D	E,D,E,D
2680	EU659111.1	2680	A	A	T	19	13056822	5312	64346	139429	CDS	VP2	bi	1D	N,H,D,Y
2682	EU659111.1	2682	C	C	T	19	11729	13978643	131014	154240	CDS	VP2	bi	3D	K,N,K,N
2684	EU659111.1	2684	G	G	T	19	11148	1745	14558996	164265	CDS	VP2	bi	1D	E,A,G,V
2836	EU659111.1	2836	C	C	G	19	24168	39427260	534850	51851	CDS	VP2	bi	1D	T,P,A,S
2837	EU659111.1	2837	C	C	T	19	26350	37354562	90931	528279	CDS	VP2	bi	1D	H,P,R,L
2842	EU659111.1	2842	T	T	G	19	29197	76489	435670	37047479	CDS	VP2	bi	1D	T,P,A,S
3117	EU659111.1	3117	A	A	G	19	34655535	79676	470012	30861	CDS	VP2	bi	3D	K,N,K,N
3207	EU659111.1	3207	T	T	C	19	91547	327297	3727	32097669	CDS	VP2	bi	3D	K,N,K,N
3208	EU659111.1	3208	G	G	A	19	9000941	105885	23050746	5755	CDS	VP2	bi	2D	I,L,V,L
3309	EU659111.1	3309	A	A	G	19	28334422	7644	398017	67486	CDS	VP2	bi	4D	T,T,T,T
3320	EU659111.1	3320	A	A	G	19	28855737	93370	506836	247364	CDS	VP2	bi	1D	D,A,G,V
3681	EU659111.1	3681	T	T	C	19	256176	455858	7605	28370068	CDS	VP2	bi	4D	T,T,T,T
3816	EU659111.1	3816	T	T	C	19	164896	239689	4704	23102698	CDS	VP2	bi	3D	E,D,E,D
3839	EU659111.1	3839	T	T	C	19	67191	260708	3427	21114052	CDS	VP2	bi	1D	N,T,S,I
4091	EU659111.1	4091	A	A	G	19	26798644	2327	434610	232333	CDS	VP2	bi	1D	D,A,G,V
4245	EU659111.1	4245	A	A	C	19	3408903	51101	5320	1737	CDS	VP2	bi	3D	Q,H,Q,H
4249	EU659111.1	4249	G	G	A	19	97912	22370	3137610	1103	CDS	VP2	bi	1D	T,P,A,S
4254	EU659111.1	4254	T	T	C	19	22550	35057	2324	2745655	CDS	VP2	bi	4D	P,P,P,P
4256	EU659111.1	4256	G	G	A	19	34987	10209	2552770	2363	CDS	VP2	bi	1D	K,T,R,I
4266	EU659111.1	4266	T	A	T	19	962391	4672	2547	711076	CDS	VP2	bi	3D	_,Y,_,Y
4267	EU659111.1	4267	T	T	A	19	107716	2529	950	1157775	CDS	VP2	bi	1D	K,Q,E,_
4268	EU659111.1	4268	A	A	T	19	1191548	4495	1776	28429	CDS	VP2	bi	2D	_,S,_,L
